# Supplementary material for: High somatic mutation and neoantigen burden are correlated with decreased progression-free survival in multiple myeloma
Source: PubMed Central journal article supplement (PMC5709757; doi:10.1038/bcj.2017.94), 2017-09-22

Figure S1

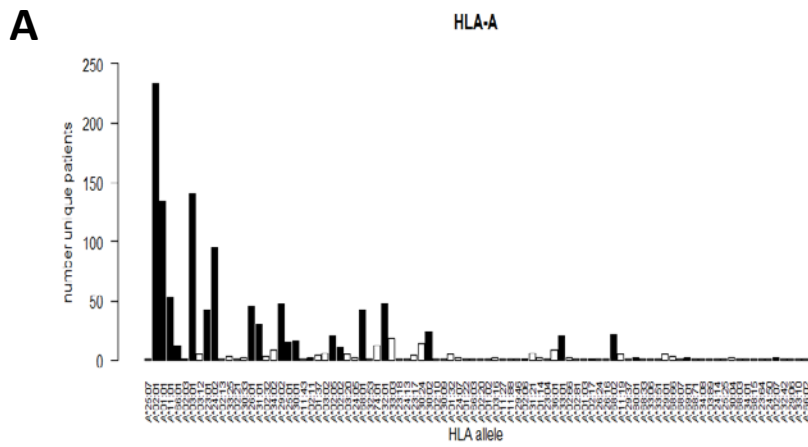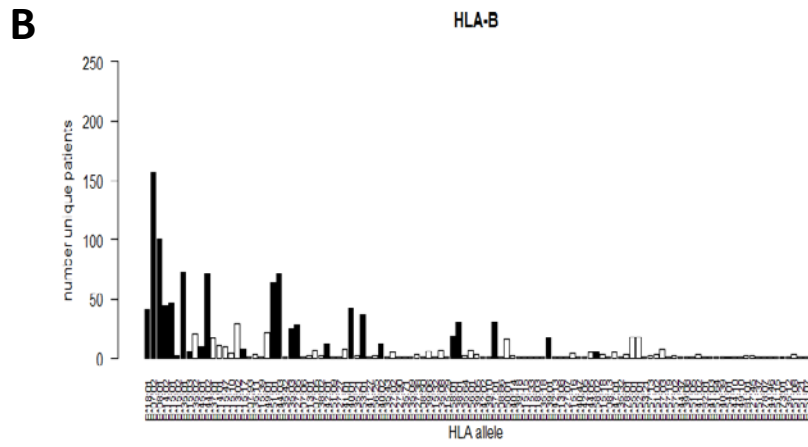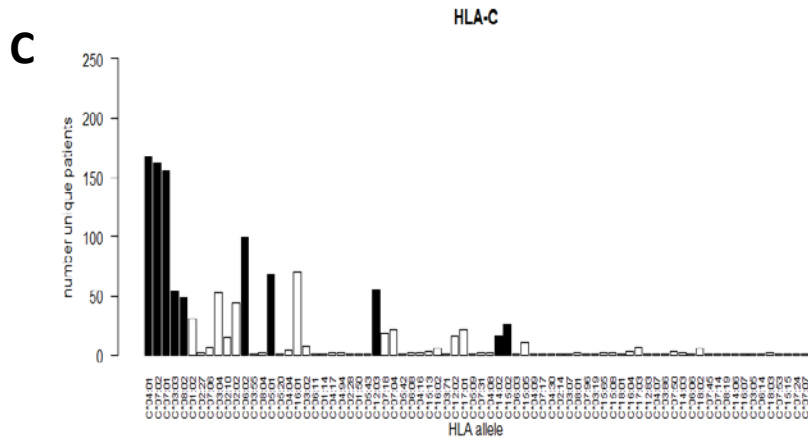

Figure S2

**A**

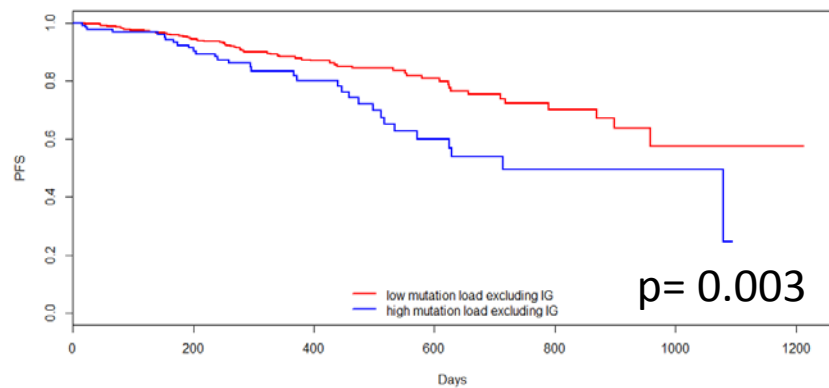

**B**

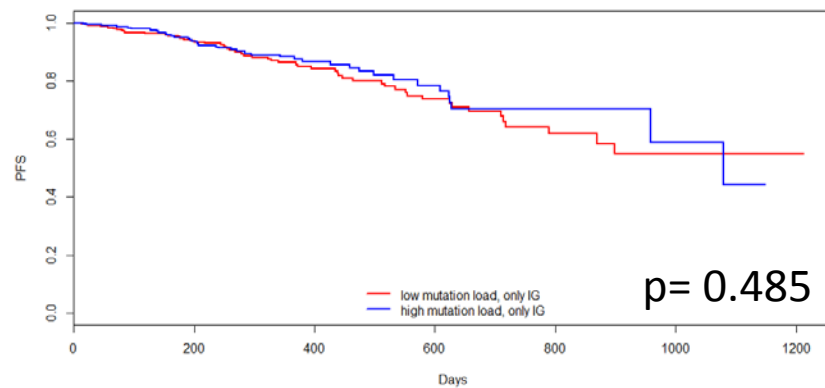

**C**

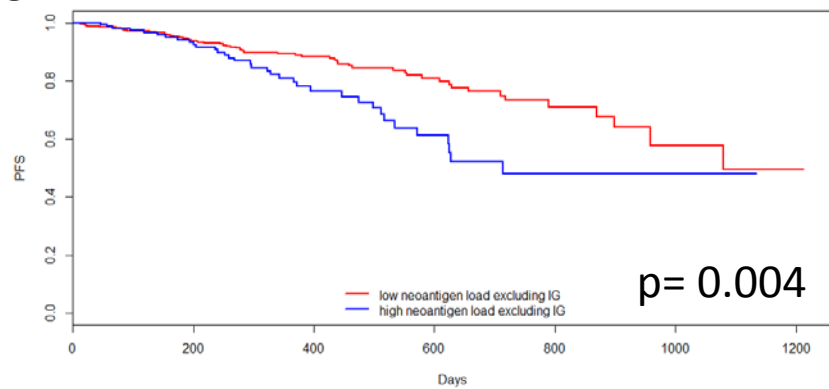

**D**

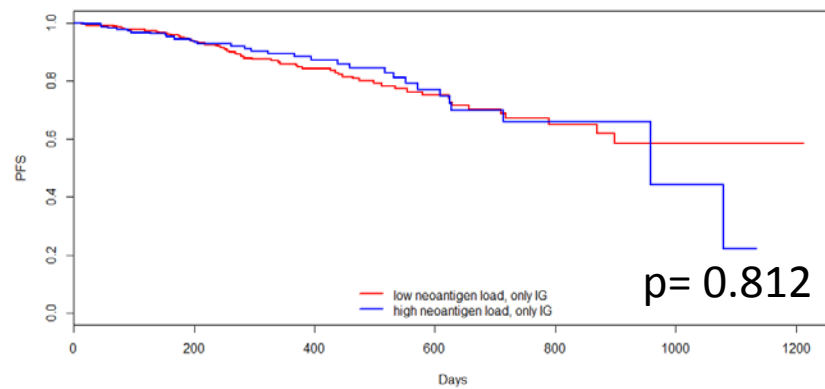

**E**

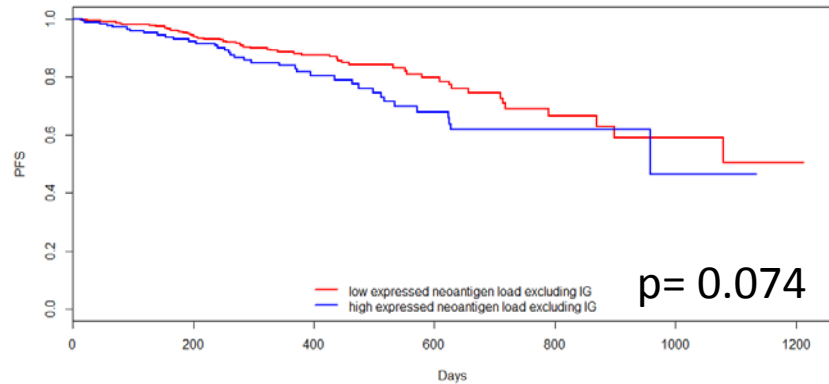

**F**

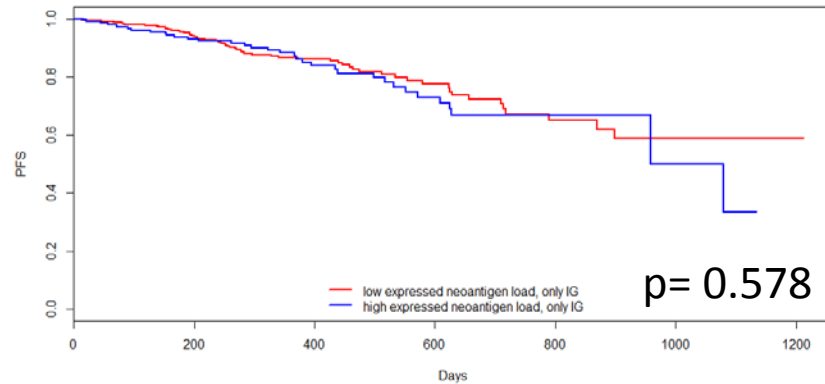

Figure S3

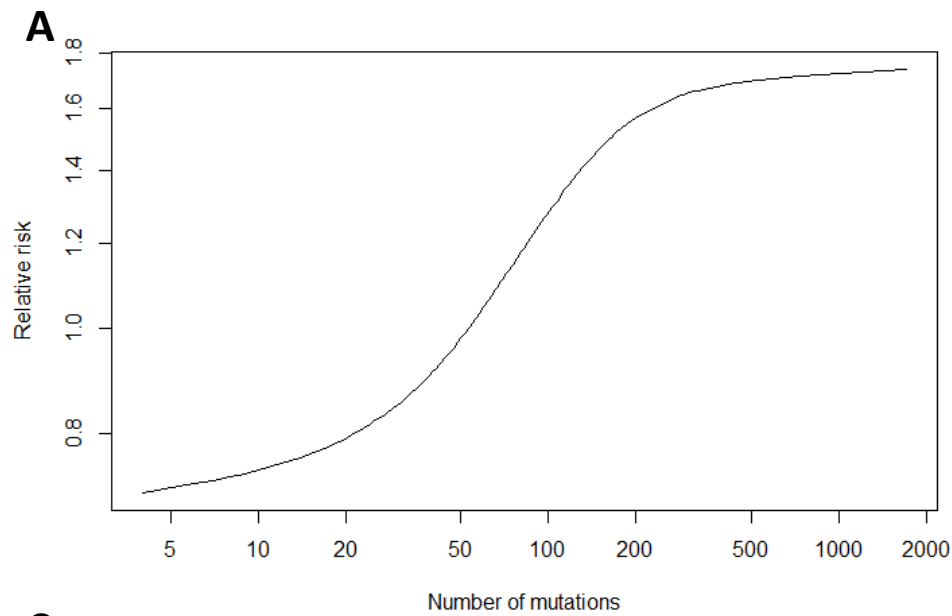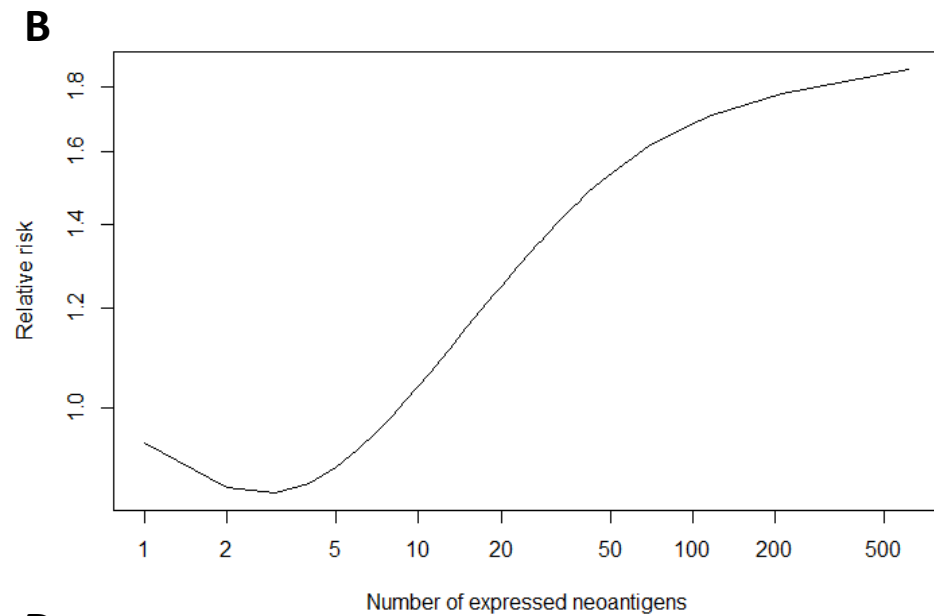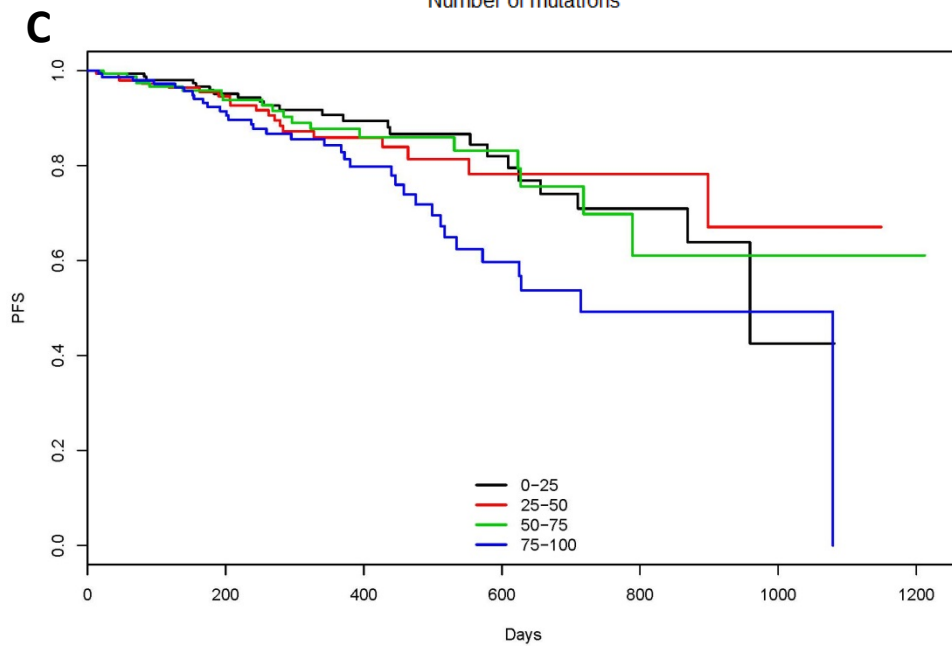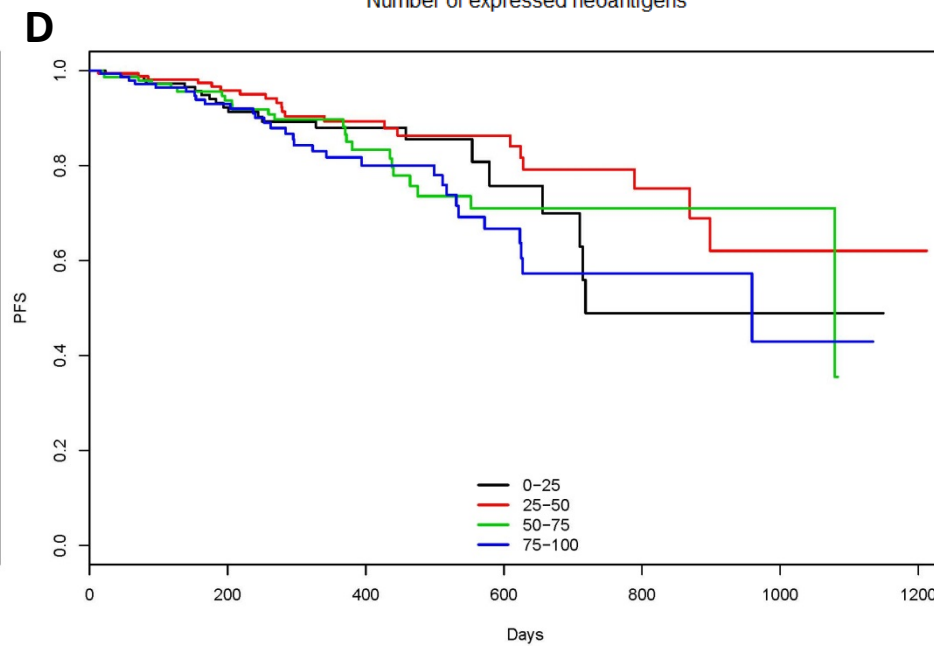

Figure S4

**A**

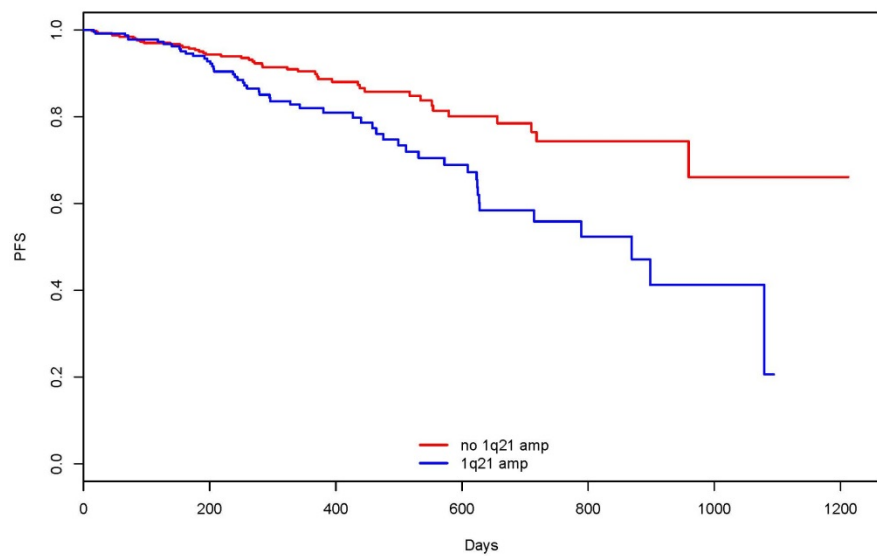

**B**

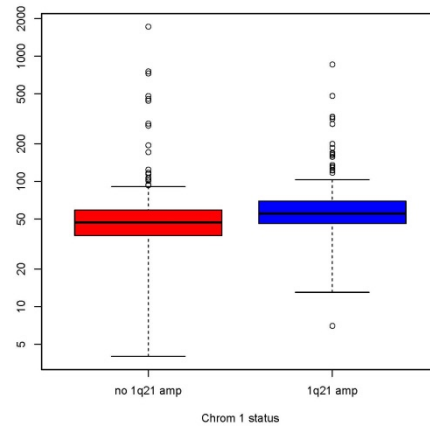

**C**

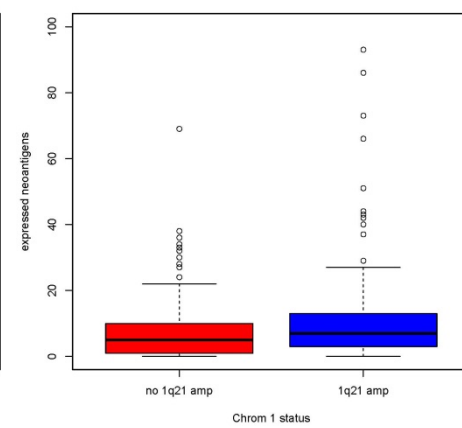

**D**

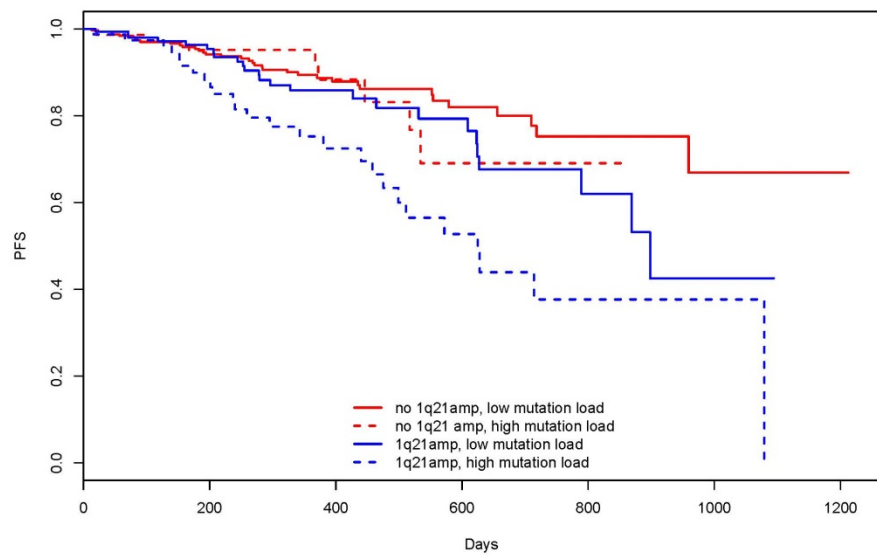

**E**

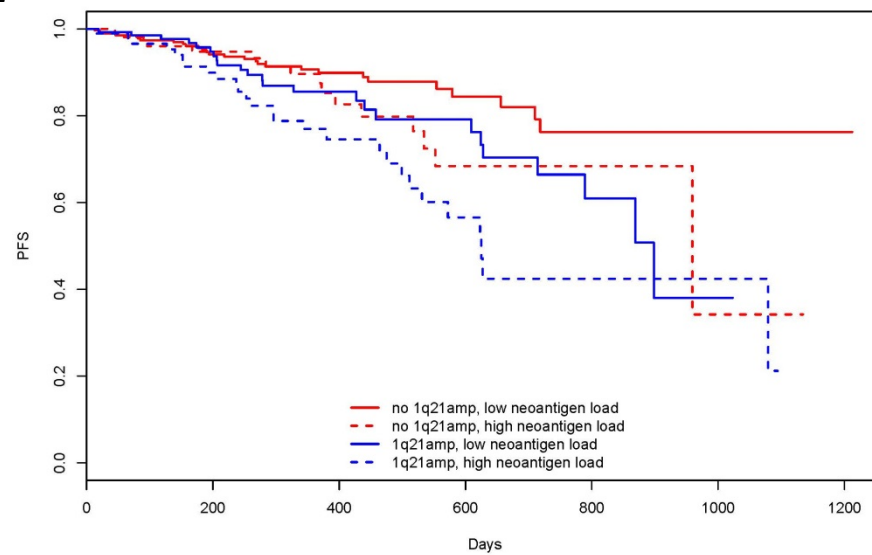

Figure S5

**A**

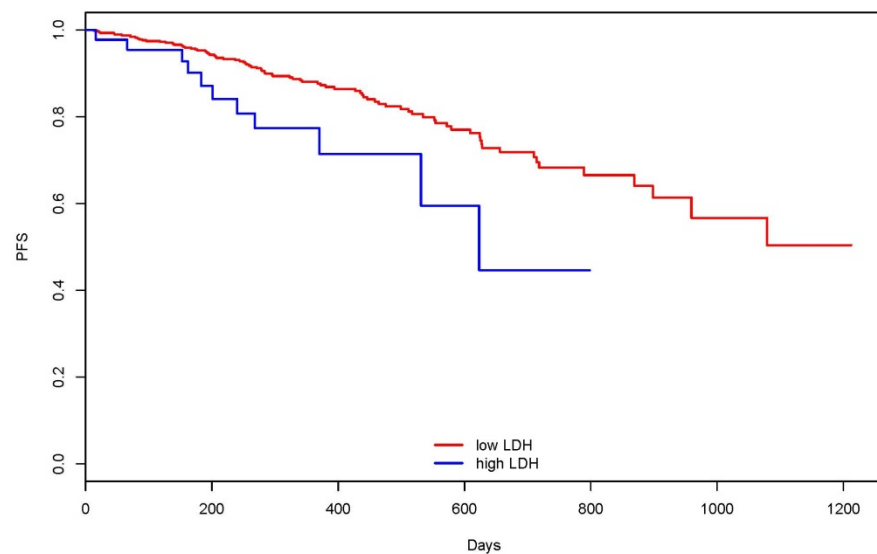

**B**

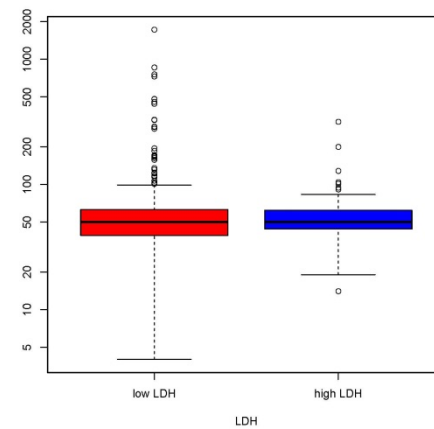

**C**

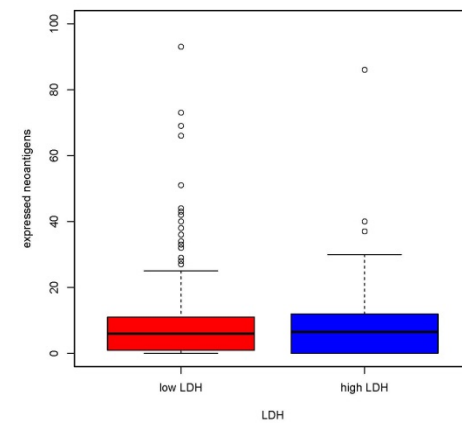

**D**

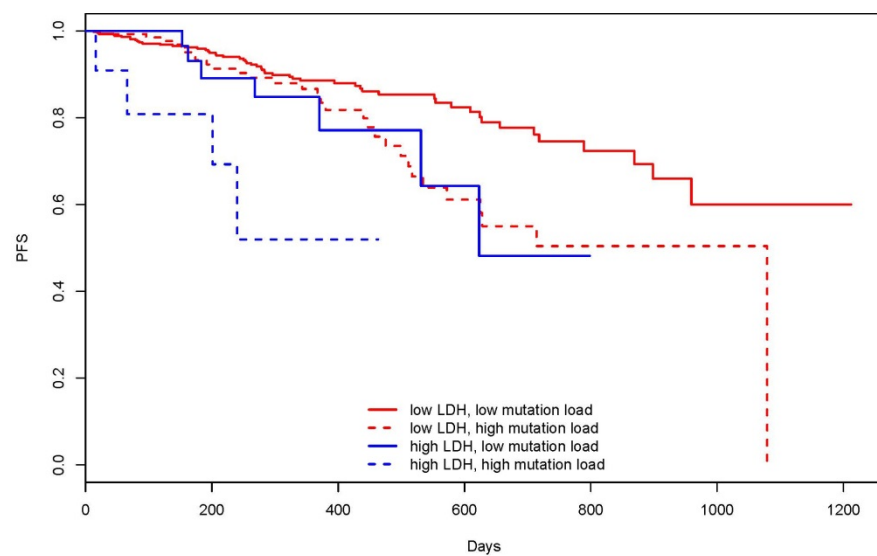

**E**

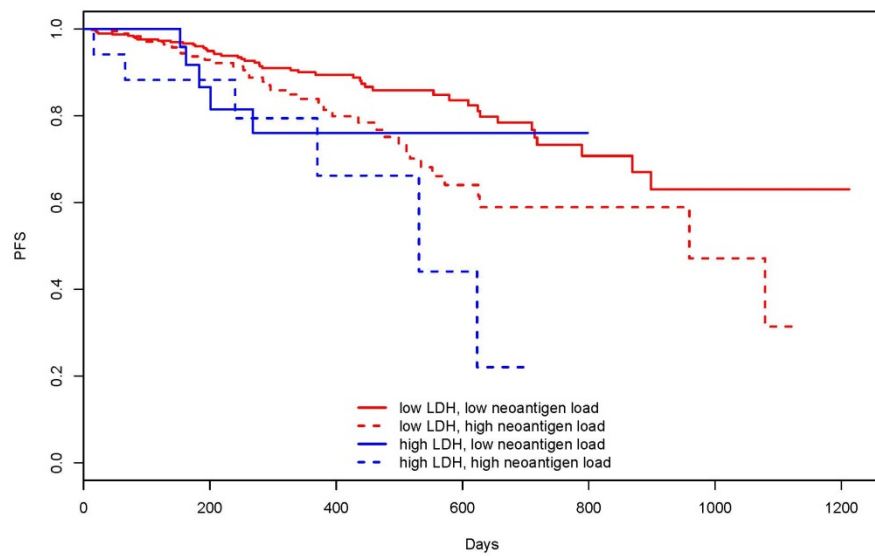

Figure S6

**A**

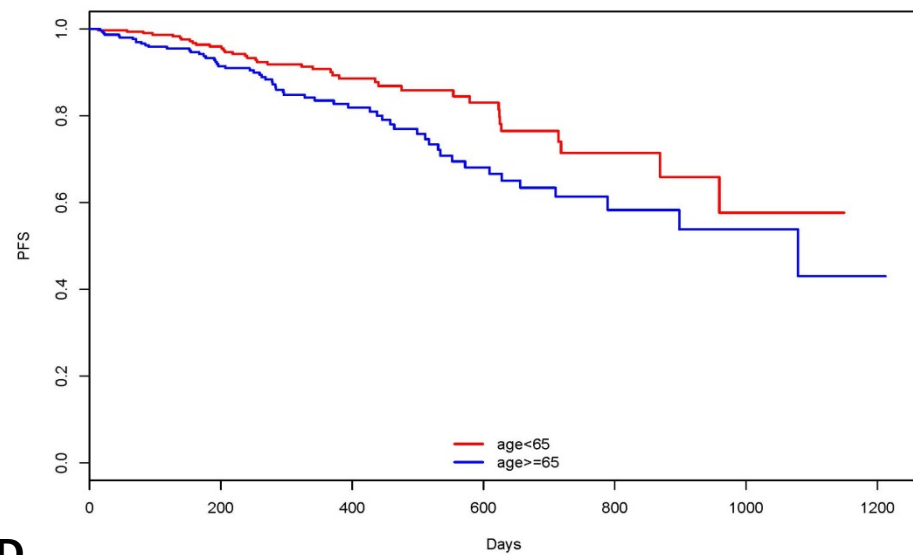

**B**

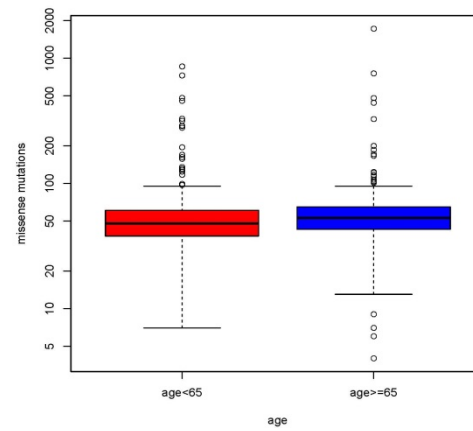

**C**

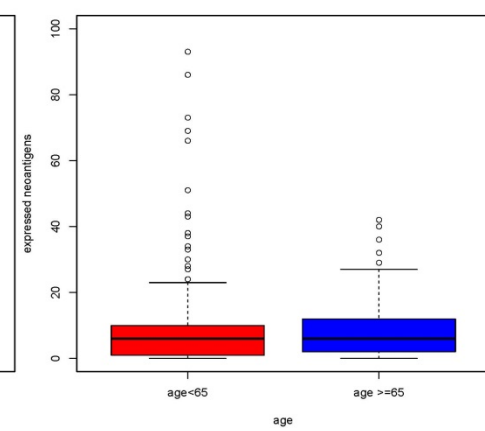

**D**

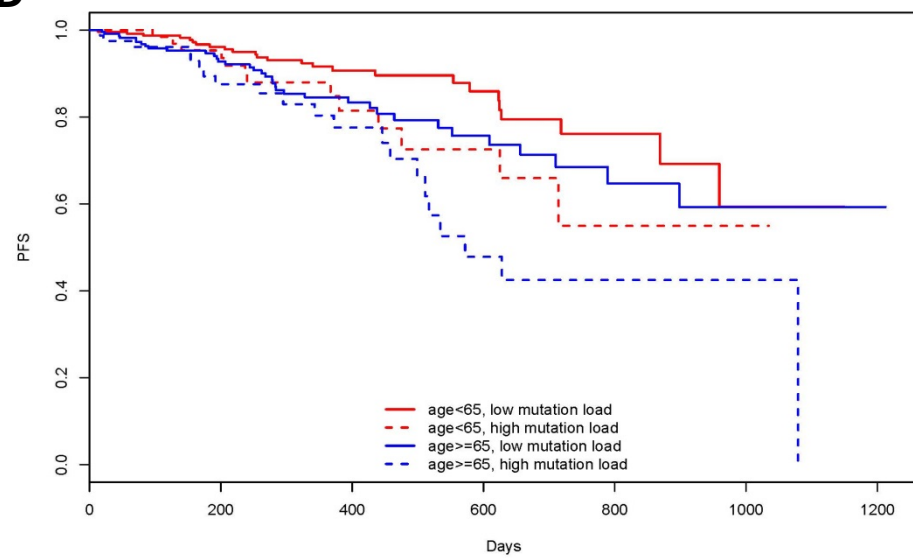

**E**

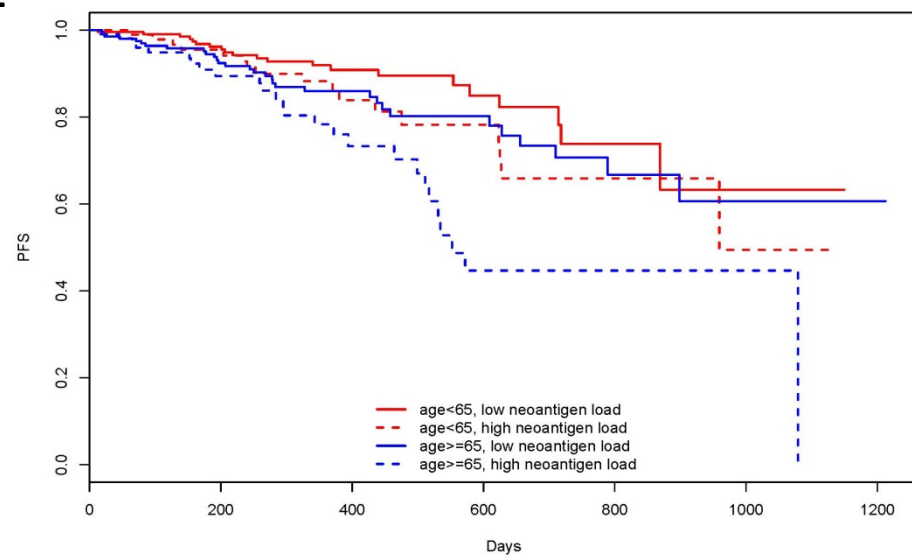

Table S1

| <b>Threshold</b>                        | <b>2 year survival rate</b> |             | <b>p-value</b> |
|-----------------------------------------|-----------------------------|-------------|----------------|
| <b>Missense Mutations</b>               | <b>low</b>                  | <b>high</b> |                |
| Missense mutations                      | 0.726                       | 0.493       | 0.00228        |
| missese mutations excluding IG          | 0.723                       | 0.494       | 0.00279        |
| <b>Neoantigens</b>                      |                             |             |                |
| neoantigen                              | 0.709                       | 0.557       | 0.0637         |
| Expressed neoantigen                    | 0.729                       | 0.555       | 0.00297        |
| neoantigen excluding IG                 | 0.733                       | 0.481       | 0.00381        |
| Expressed neoantigens excluding IG      | 0.691                       | 0.618       | 0.0737         |
| <b>Missense mutations + Neoantigens</b> |                             |             |                |
| Missense + expressed Nag                | 0.703                       | 0.488       | 0.000505       |
| Missense + Nag excluding IG             | 0.715                       | 0.436       | 0.00317        |

Table S2

| <b>Threshold</b>     | <b>2 year survival rate</b> |                     |                     |                      | <b>p-value</b>       |                       |           |
|----------------------|-----------------------------|---------------------|---------------------|----------------------|----------------------|-----------------------|-----------|
| <b>Disease Stage</b> | <b>Stage I</b>              |                     | <b>Stage II</b>     |                      | <b>Stage III</b>     |                       |           |
| Stage                | 0.783                       |                     | 0.669               |                      | 0.544                | 1.28E-05              |           |
|                      | <b>Stage I/ low</b>         | <b>Stage I/high</b> | <b>Stage II/low</b> | <b>Stage II/high</b> | <b>Stage III/low</b> | <b>Stage III/high</b> |           |
| Stage+Missense       | 0.883                       | 0.452               | 0.728               | 0.535                | 0.559                | 0.517                 | 6.61E-06  |
|                      | <b>Stage I/ low</b>         | <b>Stage I/high</b> | <b>Stage II/low</b> | <b>Stage II/high</b> | <b>Stage III/low</b> | <b>Stage III/high</b> |           |
| Stage+expressed Nag  | 0.855                       | 0.661               | 0.709               | 0.604                | 0.64                 | 0.403                 | 2.56e-.06 |

Table S3

| <b>Threshold</b>                 | <b>2 year survival rate</b> |                      |                      |                       | <b>p-value</b> |
|----------------------------------|-----------------------------|----------------------|----------------------|-----------------------|----------------|
| <b>Cytogenetic Abnormalities</b> | <b>low risk</b>             |                      | <b>high risk</b>     |                       |                |
| risk                             | 0.690                       |                      | 0.619                |                       | 0.522          |
|                                  | <b>low risk/low</b>         | <b>low risk/high</b> | <b>high risk/low</b> | <b>high risk/high</b> |                |
| risk + missense mutations        | 0.755                       | 0.315                | 0.634                | 0.598                 | 0.00528        |
|                                  | <b>low risk/low</b>         | <b>low risk/high</b> | <b>high risk/low</b> | <b>high risk/high</b> |                |
| risk + expressed neoantigens     | 0.731                       | 0.583                | 0.723                | 0.532                 | 0.0301         |

Table S4

| <b>Mutational Load Variable</b> | <b>Prognostic Risk Factor</b> | <b>Mutational Load Mean (with risk factor)</b> |                                        | <b>Mutational Load Mean (without risk factor)</b> | <b>Significant difference p-value</b> |
|---------------------------------|-------------------------------|------------------------------------------------|----------------------------------------|---------------------------------------------------|---------------------------------------|
| Missense Mutations              | Cytogenetic high risk         | 82.47024                                       |                                        | 57.60887                                          | 0.00539                               |
|                                 | 1q21amplificaitron            | 69.20968                                       |                                        | 60.73317                                          | 0.2121                                |
|                                 | Elevated LDH                  | 62.76000                                       |                                        | 63.99186                                          | 0.8732                                |
|                                 | High Age                      | 66.10123                                       |                                        | 61.77515                                          | 0.5515                                |
| Expressed Neoantigens           | Cytogenetic high risk         | 13.178571                                      |                                        | 8.114919                                          | 0.01777                               |
|                                 | 1q21amplificaitron            | 10.53226                                       |                                        | 8.71875                                           | 0.3202                                |
|                                 | Elevated LDH                  | 9.780000                                       |                                        | 9.364821                                          | 0.8608                                |
|                                 | High Age                      | 9.969325                                       |                                        | 8.843195                                          | 0.5954                                |
|                                 |                               | <b>Mutational Load Mean (stage I)</b>          | <b>Mutational Load Mean (stage II)</b> | <b>Mutational Load Mean (stage III)</b>           |                                       |
| Missense Mutations              | ISS stage                     | 67.60563                                       | 60.48899                               | 64.69192                                          | 0.743                                 |
| Expressed Neoantigens           | ISS stage                     | 10.88732                                       | 8.140969                               | 9.292929                                          | 0.544                                 |



Table S5

| Threshold                                | 2 year survival rate                |                      |                                       |                       | p-value  |
|------------------------------------------|-------------------------------------|----------------------|---------------------------------------|-----------------------|----------|
| <b>Chromosome 1 Status</b>               | <b>low risk ( no amplification)</b> |                      | <b>high risk (1q21 amplification)</b> |                       |          |
| 1q amplification                         | 0.743                               |                      | 0.559                                 |                       | 0.000702 |
|                                          | <b>low risk/low</b>                 | <b>low risk/high</b> | <b>high risk/low</b>                  | <b>high risk/high</b> |          |
| 1q amplification + missense mutations    | 0.752                               | 0.690                | 0.677                                 | 0.377                 | 9.86e-05 |
|                                          | <b>low risk/low</b>                 | <b>low risk/high</b> | <b>high risk/low</b>                  | <b>high risk/high</b> |          |
| 1q amplification + expressed neoantigens | 0.762                               | 0.684                | 0.664                                 | 0.424                 | 0.000321 |

Table S6

| Threshold                   | 2 year survival rate             |                      |                                   |                       | p-value  |
|-----------------------------|----------------------------------|----------------------|-----------------------------------|-----------------------|----------|
| <b>LDH</b>                  | <b>low risk (LDH&lt;300IU/L)</b> |                      | <b>high risk (LDH&gt;300IU/L)</b> |                       |          |
| Serum LDH level             | 0.683                            |                      | 0.446                             |                       | 0.0105   |
|                             | <b>low risk/low</b>              | <b>low risk/high</b> | <b>high risk/low</b>              | <b>high risk/high</b> |          |
| LDH + missense mutations    | 0.745                            | 0.504                | 0.482                             | 0.5191                | 7.92e-05 |
|                             | <b>low risk/low</b>              | <b>low risk/high</b> | <b>high risk/low</b>              | <b>high risk/high</b> |          |
| LDH + expressed neoantigens | 0.733                            | 0.589                | 0.760                             | 0.221                 | 0.00151  |

Table S7

| Threshold                   | 2 year survival rate        |                      |                            |                       | p-value  |
|-----------------------------|-----------------------------|----------------------|----------------------------|-----------------------|----------|
| <b>Age</b>                  | <b>low risk (age&lt;65)</b> |                      | <b>high risk (age ≥65)</b> |                       |          |
| Age                         | 0.714                       |                      | 0.613                      |                       | 0.0115   |
|                             | <b>low risk/low</b>         | <b>low risk/high</b> | <b>high risk/low</b>       | <b>high risk/high</b> |          |
| Age + missense mutations    | 0.761                       | 0.549                | 0.685                      | 0.425                 | 0.00129  |
|                             | <b>low risk/low</b>         | <b>low risk/high</b> | <b>high risk/low</b>       | <b>high risk/high</b> |          |
| Age + expressed neoantigens | 0.738                       | 0.659                | 0.707                      | 0.447                 | 0.000435 |

# Table S8

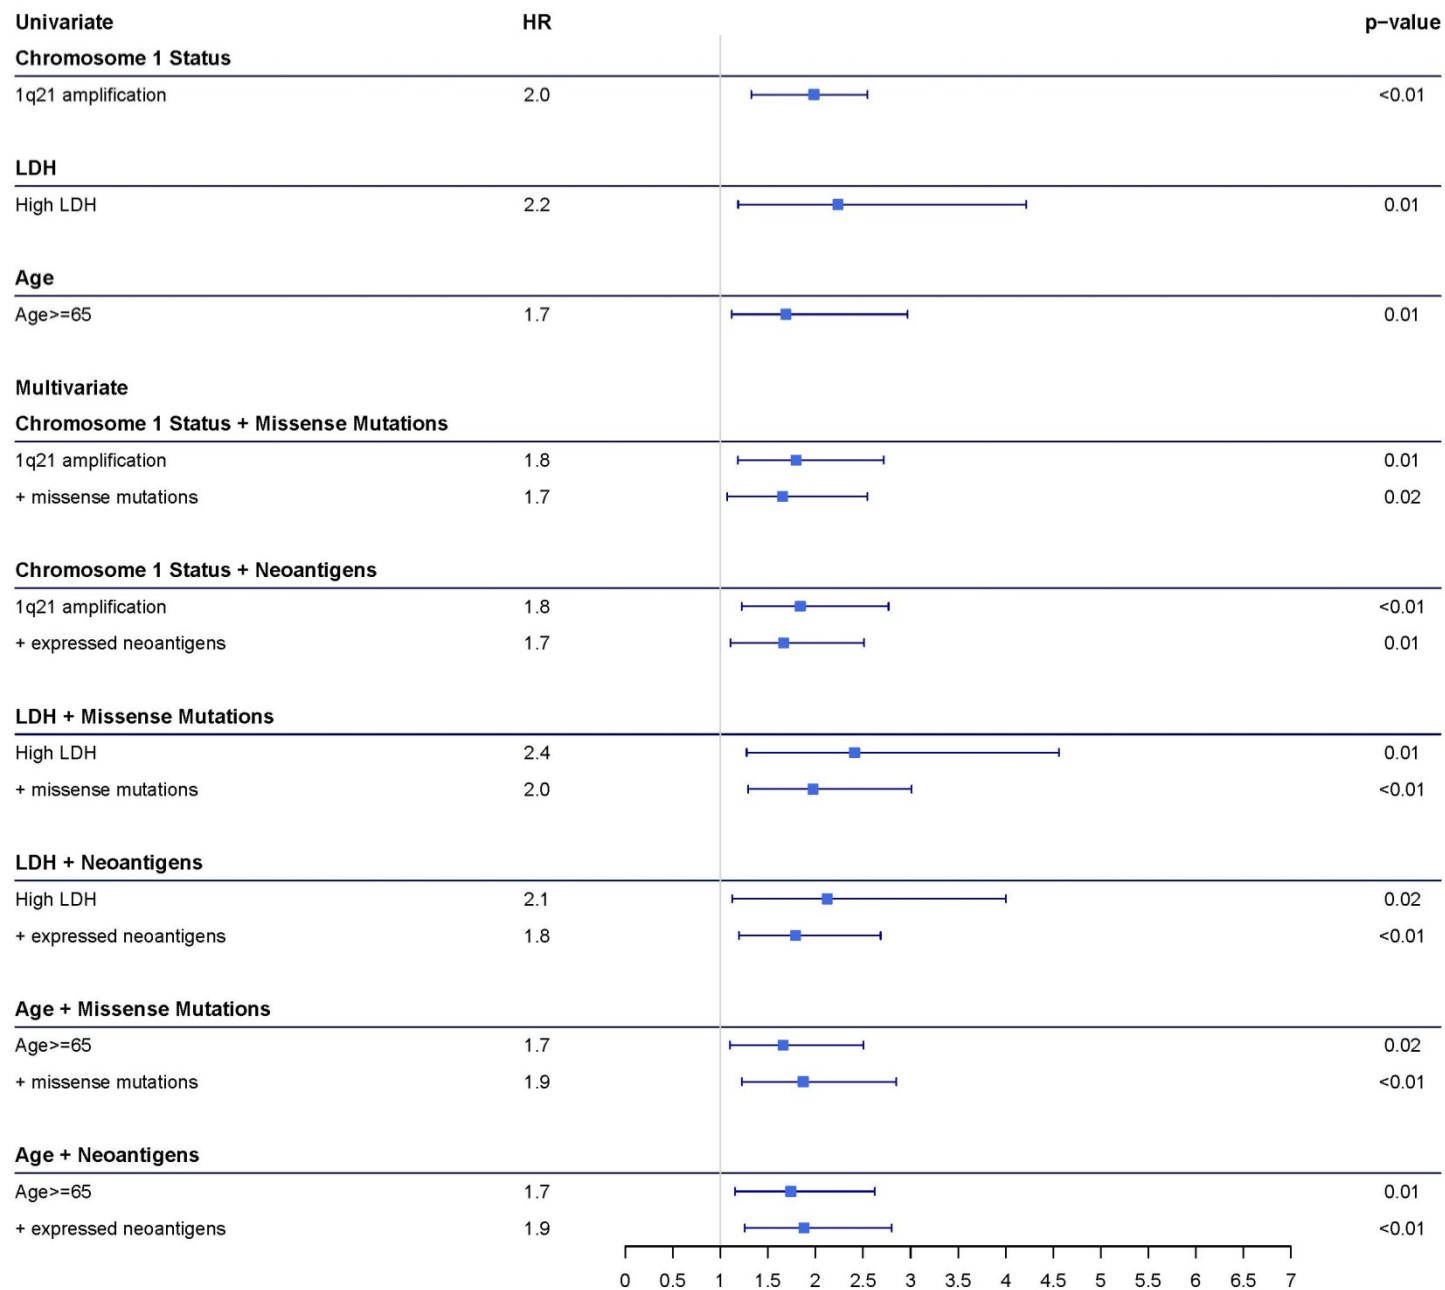

Supplement: bcj201794x2.pdf [file bcj201794x2.pdf]
